# Supplementary material
Source: publisher figshare collection journal article supplement (https://acs.figshare.com/ndownloader/files/4159993)
Supplement: Supplementary file 1 [file 4159993]

**Investigation of Chromate Coordination on Ferrihydrite by in situ ATR-FTIR Spectroscopy and Theoretical Frequency Calculations: Supporting Information**

Chad P. Johnston and Maria Chrysoschoou

Department of Civil and Environmental Engineering

University of Connecticut, Storrs CT 06269

**Contents:**

Figure S1 .....Optimized cluster models of chromate-iron oxide complexes

Figure S2.....Distribution of species as a function of pH in 100 mM Cr(VI)

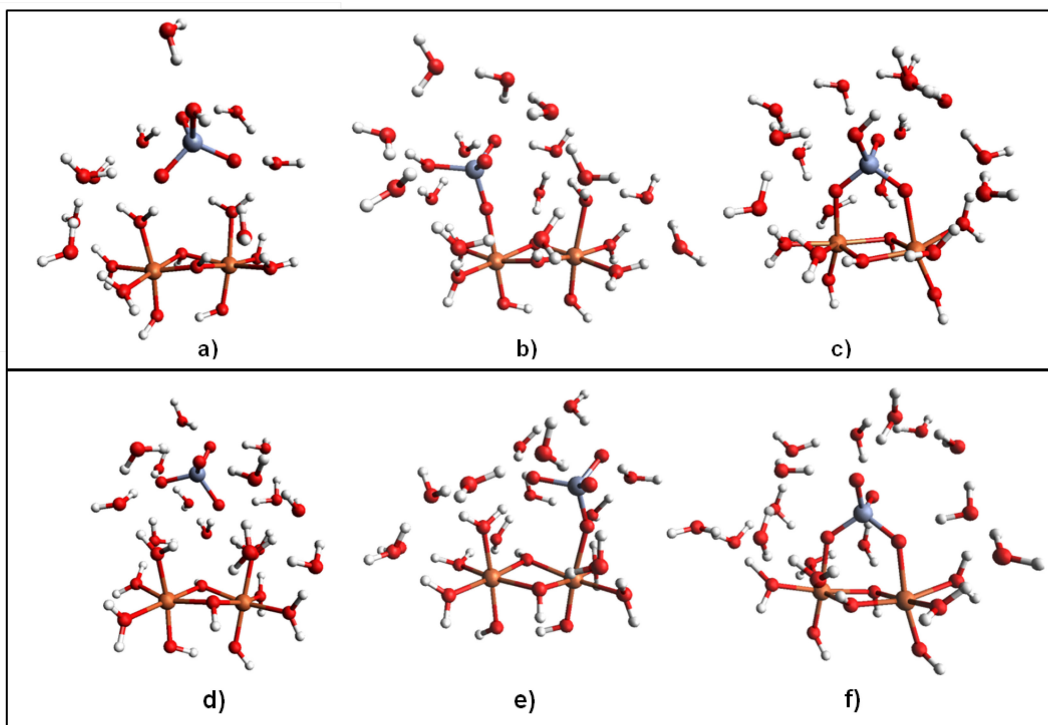

Figure S1. Protonated (top) and nonprotonated (bottom) cluster models used to calculate IR frequencies of chromate coordinated to iron oxide: outer-sphere (a, d), monodentate (b, e), and bidentate (c, f). Some explicit water molecules removed for clarity. Calculations were performed at the BY3LYP/LANL2DZ level of theory and typically converged in 1 to 7 days of computational time.

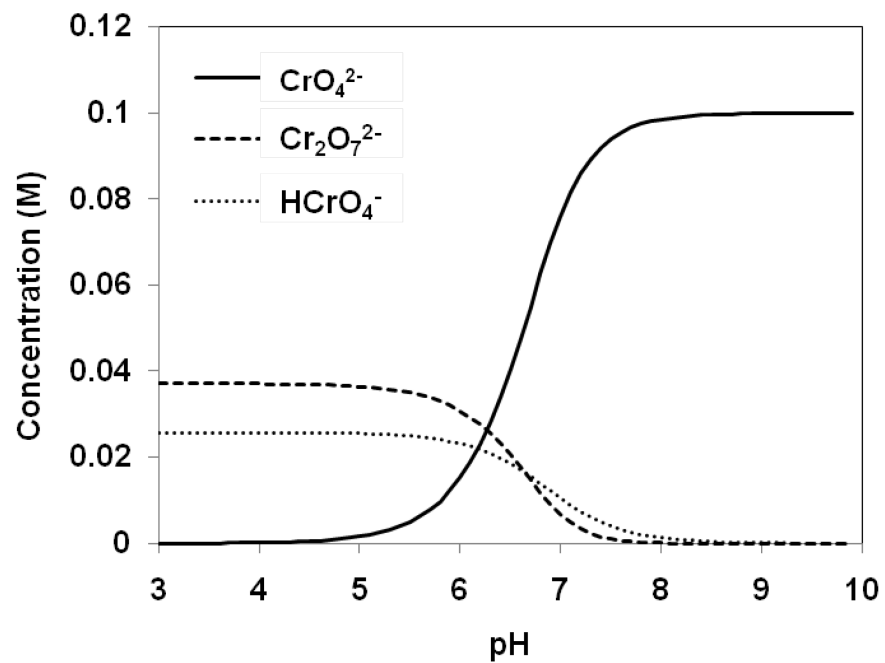

Figure S2. Distribution of chromate species in 100 mM solution as a function of pH.
